# Supplementary material
Source: Springer Nature journal article supplement (https://www.springermedizin.de/resource/supplementary/12885_2012_3580_MOESM1_ESM.pdf/9464174)
Supplement: MOESM1 [file 9464174]

## THE BREAST CANCER DELAY QUESTIONNAIRE

### **INSTRUMENTO PARA MEDIR EL RETRASO EN LA ATENCIÓN MÉDICA DEL CÁNCER DE MAMA**

---

*La aplicación de este instrumento combinada con la revisión de expediente de la paciente con cáncer de mama, permite estimar los intervalos de tiempo especificados abajo así como los factores asociados con retrasos en estos intervalos.*

*INTERVALO TOTAL: tiempo transcurrido desde la identificación de un problema mamario hasta el inicio del tratamiento oncológico.*

*INTERVALO DE LA PACIENTE: de la identificación del problema a la primera consulta médica.*

*INTERVALO DE LOS SERVICIOS DE SALUD: de la primera consulta al inicio del tratamiento.*

*INTERVALO DE DIAGNÓSTICO: de la primera consulta médica a la confirmación del diagnóstico.*

*INTERVALO DE TRATAMIENTO: del diagnóstico al inicio del tratamiento.*

---

---

*\*Este instrumento está elaborado para ser aplicado mediante una entrevista a pacientes en quienes exista una alta sospecha del diagnóstico de cáncer de mama, a su llegada a una institución oncológica. Se recomienda excluir a pacientes con las siguientes características:*

- a) Aquellas que tuvieron cáncer anteriormente*
  - b) Aquellas que ya recibieron tratamiento oncológico para la presente enfermedad*
  - c) Aquellas con enfermedades benignas de la mama bajo seguimiento*
- 

*Se permite su reproducción y uso sólo con fines de investigación.*

*Favor de citar la referencia como se indica abajo:*

The reproduction of this instrument is permitted for research use only.

Please cite the reference as follows:

Karla Unger Saldaña, Ingris Pelaez Ballestas & Claudia Infante Castañeda. **Development and validation of a questionnaire to assess breast cancer delay.** *BMC Cancer*, 2012;**12**:626.

# BÚSQUEDA DE ATENCIÓN MÉDICA DE PACIENTES QUE ACUDEN AL DEPARTAMENTO DE TUMORES MAMARIOS

## 1. DESCUBRIMIENTO DEL PROBLEMA DE SALUD

(Nombre de la entrevistada), ahora le voy a hacer algunas preguntas sobre el problema de salud por el cual vino a este hospital.

|                                                                                                                                                                                                                                                                                                                                                                                                                                                                                                                                                                                                                                                                                                                                                                                                                                                                                                                                                                                                                                                                                                                                                                                                                                                                                                                                                                                                                                                                                                                                                                                                                                                                                                                                                                                                                                                                                                                                                                                                                                                                                                                                                                           |          |          |          |          |          |          |  |          |          |          |          |          |          |          |        |  |       |  |  |        |  |                                                                                                                                                                                                                                                                                                                                                                                                                                                                                                                                                                                                                                                                                                                                                                                                                                                                                                                                                                                                                                  |
|---------------------------------------------------------------------------------------------------------------------------------------------------------------------------------------------------------------------------------------------------------------------------------------------------------------------------------------------------------------------------------------------------------------------------------------------------------------------------------------------------------------------------------------------------------------------------------------------------------------------------------------------------------------------------------------------------------------------------------------------------------------------------------------------------------------------------------------------------------------------------------------------------------------------------------------------------------------------------------------------------------------------------------------------------------------------------------------------------------------------------------------------------------------------------------------------------------------------------------------------------------------------------------------------------------------------------------------------------------------------------------------------------------------------------------------------------------------------------------------------------------------------------------------------------------------------------------------------------------------------------------------------------------------------------------------------------------------------------------------------------------------------------------------------------------------------------------------------------------------------------------------------------------------------------------------------------------------------------------------------------------------------------------------------------------------------------------------------------------------------------------------------------------------------------|----------|----------|----------|----------|----------|----------|--|----------|----------|----------|----------|----------|----------|----------|--------|--|-------|--|--|--------|--|----------------------------------------------------------------------------------------------------------------------------------------------------------------------------------------------------------------------------------------------------------------------------------------------------------------------------------------------------------------------------------------------------------------------------------------------------------------------------------------------------------------------------------------------------------------------------------------------------------------------------------------------------------------------------------------------------------------------------------------------------------------------------------------------------------------------------------------------------------------------------------------------------------------------------------------------------------------------------------------------------------------------------------|
| <p><b>1.01</b></p> <p>¿En qué <b>fecha identificó por primera vez</b> (o se dio cuenta) que tenía un problema en el pecho?</p> <p style="text-align: center;"><i>INTENTAR DOCUMENTAR CON LA MAYOR EXACTITUD POSIBLE POR LO MENOS MES Y AÑO. UTILIZAR EL CALENDARIO PARA AYUDARLE A LA MUJER A RECORDAR.</i></p> <div style="text-align: center; margin: 10px 0;"> <table style="margin: auto; border-collapse: collapse;"> <tr> <td style="border: 1px solid black; width: 20px; height: 20px;"></td> <td style="border: 1px solid black; width: 20px; height: 20px;"></td> <td style="border: 1px solid black; width: 20px; height: 20px;"></td> <td style="border: 1px solid black; width: 20px; height: 20px;"></td> <td style="border: 1px solid black; width: 20px; height: 20px;"></td> <td style="border: 1px solid black; width: 20px; height: 20px;"></td> <td style="border: 1px solid black; width: 20px; height: 20px;"></td> </tr> <tr> <td style="text-align: center; padding: 2px;"><i>d</i></td> <td style="text-align: center; padding: 2px;"><i>d</i></td> <td style="text-align: center; padding: 2px;"><i>m</i></td> <td style="text-align: center; padding: 2px;"><i>m</i></td> <td style="text-align: center; padding: 2px;"><i>m</i></td> <td style="text-align: center; padding: 2px;"><i>a</i></td> <td style="text-align: center; padding: 2px;"><i>a</i></td> </tr> <tr> <td style="text-align: center; padding: 2px;">número</td> <td></td> <td style="text-align: center; padding: 2px;">letra</td> <td></td> <td></td> <td style="text-align: center; padding: 2px;">número</td> <td></td> </tr> </table> </div> <p><i>Si no recuerda con exactitud el <b>día</b>, acotar si fue a inicios, mediados o finales del mes:</i></p> <p>a) A inicios del mes<br/>b) A mediados del mes<br/>c) A finales del mes</p> <p><i>Si no recuerda con exactitud el <b>mes</b>, acotar si fue a inicios, mediados o finales del año:</i></p> <p>a) A inicios del año<br/>b) A mediados del año<br/>c) A finales del año</p> <p style="text-align: center;"><b><i>Si no recuerda día o mes en lo absoluto, colocar "98" ó "988" respectivamente</i></b></p> |          |          |          |          |          |          |  | <i>d</i> | <i>d</i> | <i>m</i> | <i>m</i> | <i>m</i> | <i>a</i> | <i>a</i> | número |  | letra |  |  | número |  | <p><b>1.02</b></p> <p>¿<b>Cómo supo</b> que tenía algún problema en el pecho?</p> <p style="text-align: center;"><i>SI MENCIONA ALGÚN SÍNTOMA, RESPONDA 1 Y PASE A LA SIGUIENTE PREGUNTA.</i></p> <p>Síntomas de la mujer..... 1</p> <p>Mastografía de detección oportuna..... 2</p> <p>Exploración clínica mamaria de rutina..... 3</p> <div style="float: right; border: 1px solid black; padding: 5px; margin-top: 10px;"> <p style="text-align: center;"><b>PASE A 3.01</b></p> </div> <hr/> <p><b>1.03</b></p> <p>¿Cuál fue el <b>primer síntoma</b> que notó?</p> <p style="text-align: center;"><i>NO LEA LAS OPCIONES EN ALTO. ACEPTE SÓLO <u>UNA</u> RESPUESTA.</i></p> <p>1) Bolita o engrosamiento en el pecho ("bola", "granito", "bolita", "tumor", "tumorcito", "pelota", endurecimiento, etc)</p> <p>2) Dolor en el pecho ("ardor", "punzadas", "piquetes")</p> <p>3) Otras molestias</p> <hr/> <p style="text-align: center; font-size: small;"><i>ESPECIFICAR CON PALABRAS TEXTUALES DE LA ENTREVISTADA</i></p> |
|                                                                                                                                                                                                                                                                                                                                                                                                                                                                                                                                                                                                                                                                                                                                                                                                                                                                                                                                                                                                                                                                                                                                                                                                                                                                                                                                                                                                                                                                                                                                                                                                                                                                                                                                                                                                                                                                                                                                                                                                                                                                                                                                                                           |          |          |          |          |          |          |  |          |          |          |          |          |          |          |        |  |       |  |  |        |  |                                                                                                                                                                                                                                                                                                                                                                                                                                                                                                                                                                                                                                                                                                                                                                                                                                                                                                                                                                                                                                  |
| <i>d</i>                                                                                                                                                                                                                                                                                                                                                                                                                                                                                                                                                                                                                                                                                                                                                                                                                                                                                                                                                                                                                                                                                                                                                                                                                                                                                                                                                                                                                                                                                                                                                                                                                                                                                                                                                                                                                                                                                                                                                                                                                                                                                                                                                                  | <i>d</i> | <i>m</i> | <i>m</i> | <i>m</i> | <i>a</i> | <i>a</i> |  |          |          |          |          |          |          |          |        |  |       |  |  |        |  |                                                                                                                                                                                                                                                                                                                                                                                                                                                                                                                                                                                                                                                                                                                                                                                                                                                                                                                                                                                                                                  |
| número                                                                                                                                                                                                                                                                                                                                                                                                                                                                                                                                                                                                                                                                                                                                                                                                                                                                                                                                                                                                                                                                                                                                                                                                                                                                                                                                                                                                                                                                                                                                                                                                                                                                                                                                                                                                                                                                                                                                                                                                                                                                                                                                                                    |          | letra    |          |          | número   |          |  |          |          |          |          |          |          |          |        |  |       |  |  |        |  |                                                                                                                                                                                                                                                                                                                                                                                                                                                                                                                                                                                                                                                                                                                                                                                                                                                                                                                                                                                                                                  |

*Se permite su reproducción y uso sólo con fines de investigación. Favor de citar la referencia como se indica:*

*The reproduction of this instrument is permitted for research use only. Please cite the reference appropriately as follows:*

Unger-Saldaña K, Pelaez-Ballestas I & Infante-Castañeda C. **Development and validation of a questionnaire to assess breast cancer delay.** *BMC Cancer*, 2012;12:626.

## BÚSQUEDA DE ATENCIÓN MÉDICA DE PACIENTES QUE ACUDEN AL DEPARTAMENTO DE TUMORES MAMARIOS

| 2. PERCEPCIÓN DE LAS MOLESTIAS                                                                                                                                                                                                                                                                                                                                                                                                                      |                                                                                                                                                                                                                                                                                                                                                                                                                                                                                                                                                                                                                                                                                                                                                                                                                                                                                                                                                                                                                                                                                                                                                                                                                                                                                                                                                                                                                                                                                                                                                                                                                                                                                                                                                                                                                                                                                                                                                                                                                                                                                                                                                                                                                                                                                                                                                                                                                                                                                                        |                          |    |    |                                         |                          |                          |                       |                          |                          |                                                          |                          |                          |                                                                        |                          |                          |                                                         |                          |                          |                                         |                          |                          |                         |                          |                          |                                  |                          |                          |                                   |                          |                          |                                                       |                          |                          |
|-----------------------------------------------------------------------------------------------------------------------------------------------------------------------------------------------------------------------------------------------------------------------------------------------------------------------------------------------------------------------------------------------------------------------------------------------------|--------------------------------------------------------------------------------------------------------------------------------------------------------------------------------------------------------------------------------------------------------------------------------------------------------------------------------------------------------------------------------------------------------------------------------------------------------------------------------------------------------------------------------------------------------------------------------------------------------------------------------------------------------------------------------------------------------------------------------------------------------------------------------------------------------------------------------------------------------------------------------------------------------------------------------------------------------------------------------------------------------------------------------------------------------------------------------------------------------------------------------------------------------------------------------------------------------------------------------------------------------------------------------------------------------------------------------------------------------------------------------------------------------------------------------------------------------------------------------------------------------------------------------------------------------------------------------------------------------------------------------------------------------------------------------------------------------------------------------------------------------------------------------------------------------------------------------------------------------------------------------------------------------------------------------------------------------------------------------------------------------------------------------------------------------------------------------------------------------------------------------------------------------------------------------------------------------------------------------------------------------------------------------------------------------------------------------------------------------------------------------------------------------------------------------------------------------------------------------------------------------|--------------------------|----|----|-----------------------------------------|--------------------------|--------------------------|-----------------------|--------------------------|--------------------------|----------------------------------------------------------|--------------------------|--------------------------|------------------------------------------------------------------------|--------------------------|--------------------------|---------------------------------------------------------|--------------------------|--------------------------|-----------------------------------------|--------------------------|--------------------------|-------------------------|--------------------------|--------------------------|----------------------------------|--------------------------|--------------------------|-----------------------------------|--------------------------|--------------------------|-------------------------------------------------------|--------------------------|--------------------------|
| <p><b>2.01</b> Cuando lo notó por primera vez, <b>¿qué tan grave</b> pensó que era?</p> <p style="text-align: center;"><i>LEA TODAS LAS OPCIONES DE RESPUESTA EN VOZ ALTA</i></p> <p>Nada grave? ..... 0<br/>                     Poco grave? ..... 1<br/>                     Moderadamente grave? ..... 2<br/>                     Grave? ..... 3<br/>                     O muy grave? ..... 4<br/>                     No responde ..... 99</p> | <p><b>2.04</b> Ahora le voy a leer algunas molestias y quisiera que me vaya diciendo si ha tenido alguna de ellas. <b>¿Me podría decir si ha tenido...</b></p> <p style="text-align: center;"><i>LEA LAS OPCIONES UNA POR UNA EN ALTO Y LLENE EL CUADRITO CORRESPONDIENTE A LA RESPUESTA DE LA MUJER (SI O NO) PARA CADA SÍNTOMA</i></p> <table style="width: 100%; border: none;"> <thead> <tr> <th style="width: 80%;"></th> <th style="text-align: center;">SÍ</th> <th style="text-align: center;">NO</th> </tr> </thead> <tbody> <tr> <td>1. Bolita en la axila, cuello o tronco?</td> <td style="text-align: center;"><input type="checkbox"/></td> <td style="text-align: center;"><input type="checkbox"/></td> </tr> <tr> <td>2. Dolor en el pecho?</td> <td style="text-align: center;"><input type="checkbox"/></td> <td style="text-align: center;"><input type="checkbox"/></td> </tr> <tr> <td>3. Dolor del brazo del mismo lado que el pecho afectado?</td> <td style="text-align: center;"><input type="checkbox"/></td> <td style="text-align: center;"><input type="checkbox"/></td> </tr> <tr> <td>4. Cambios de color en la piel del pecho (como a rojo, café o morado)?</td> <td style="text-align: center;"><input type="checkbox"/></td> <td style="text-align: center;"><input type="checkbox"/></td> </tr> <tr> <td>5. Hormigueo o entumecimiento del brazo del mismo lado?</td> <td style="text-align: center;"><input type="checkbox"/></td> <td style="text-align: center;"><input type="checkbox"/></td> </tr> <tr> <td>6. Úlcera o llaga en la piel del pecho?</td> <td style="text-align: center;"><input type="checkbox"/></td> <td style="text-align: center;"><input type="checkbox"/></td> </tr> <tr> <td>7. Comezón en el pecho?</td> <td style="text-align: center;"><input type="checkbox"/></td> <td style="text-align: center;"><input type="checkbox"/></td> </tr> <tr> <td>8. Aumento del tamaño del pecho?</td> <td style="text-align: center;"><input type="checkbox"/></td> <td style="text-align: center;"><input type="checkbox"/></td> </tr> <tr> <td>9. Cambios en la forma del pecho?</td> <td style="text-align: center;"><input type="checkbox"/></td> <td style="text-align: center;"><input type="checkbox"/></td> </tr> <tr> <td>10. Que le haya salido líquido o sangre por el pezón?</td> <td style="text-align: center;"><input type="checkbox"/></td> <td style="text-align: center;"><input type="checkbox"/></td> </tr> </tbody> </table> |                          | SÍ | NO | 1. Bolita en la axila, cuello o tronco? | <input type="checkbox"/> | <input type="checkbox"/> | 2. Dolor en el pecho? | <input type="checkbox"/> | <input type="checkbox"/> | 3. Dolor del brazo del mismo lado que el pecho afectado? | <input type="checkbox"/> | <input type="checkbox"/> | 4. Cambios de color en la piel del pecho (como a rojo, café o morado)? | <input type="checkbox"/> | <input type="checkbox"/> | 5. Hormigueo o entumecimiento del brazo del mismo lado? | <input type="checkbox"/> | <input type="checkbox"/> | 6. Úlcera o llaga en la piel del pecho? | <input type="checkbox"/> | <input type="checkbox"/> | 7. Comezón en el pecho? | <input type="checkbox"/> | <input type="checkbox"/> | 8. Aumento del tamaño del pecho? | <input type="checkbox"/> | <input type="checkbox"/> | 9. Cambios en la forma del pecho? | <input type="checkbox"/> | <input type="checkbox"/> | 10. Que le haya salido líquido o sangre por el pezón? | <input type="checkbox"/> | <input type="checkbox"/> |
|                                                                                                                                                                                                                                                                                                                                                                                                                                                     | SÍ                                                                                                                                                                                                                                                                                                                                                                                                                                                                                                                                                                                                                                                                                                                                                                                                                                                                                                                                                                                                                                                                                                                                                                                                                                                                                                                                                                                                                                                                                                                                                                                                                                                                                                                                                                                                                                                                                                                                                                                                                                                                                                                                                                                                                                                                                                                                                                                                                                                                                                     | NO                       |    |    |                                         |                          |                          |                       |                          |                          |                                                          |                          |                          |                                                                        |                          |                          |                                                         |                          |                          |                                         |                          |                          |                         |                          |                          |                                  |                          |                          |                                   |                          |                          |                                                       |                          |                          |
| 1. Bolita en la axila, cuello o tronco?                                                                                                                                                                                                                                                                                                                                                                                                             | <input type="checkbox"/>                                                                                                                                                                                                                                                                                                                                                                                                                                                                                                                                                                                                                                                                                                                                                                                                                                                                                                                                                                                                                                                                                                                                                                                                                                                                                                                                                                                                                                                                                                                                                                                                                                                                                                                                                                                                                                                                                                                                                                                                                                                                                                                                                                                                                                                                                                                                                                                                                                                                               | <input type="checkbox"/> |    |    |                                         |                          |                          |                       |                          |                          |                                                          |                          |                          |                                                                        |                          |                          |                                                         |                          |                          |                                         |                          |                          |                         |                          |                          |                                  |                          |                          |                                   |                          |                          |                                                       |                          |                          |
| 2. Dolor en el pecho?                                                                                                                                                                                                                                                                                                                                                                                                                               | <input type="checkbox"/>                                                                                                                                                                                                                                                                                                                                                                                                                                                                                                                                                                                                                                                                                                                                                                                                                                                                                                                                                                                                                                                                                                                                                                                                                                                                                                                                                                                                                                                                                                                                                                                                                                                                                                                                                                                                                                                                                                                                                                                                                                                                                                                                                                                                                                                                                                                                                                                                                                                                               | <input type="checkbox"/> |    |    |                                         |                          |                          |                       |                          |                          |                                                          |                          |                          |                                                                        |                          |                          |                                                         |                          |                          |                                         |                          |                          |                         |                          |                          |                                  |                          |                          |                                   |                          |                          |                                                       |                          |                          |
| 3. Dolor del brazo del mismo lado que el pecho afectado?                                                                                                                                                                                                                                                                                                                                                                                            | <input type="checkbox"/>                                                                                                                                                                                                                                                                                                                                                                                                                                                                                                                                                                                                                                                                                                                                                                                                                                                                                                                                                                                                                                                                                                                                                                                                                                                                                                                                                                                                                                                                                                                                                                                                                                                                                                                                                                                                                                                                                                                                                                                                                                                                                                                                                                                                                                                                                                                                                                                                                                                                               | <input type="checkbox"/> |    |    |                                         |                          |                          |                       |                          |                          |                                                          |                          |                          |                                                                        |                          |                          |                                                         |                          |                          |                                         |                          |                          |                         |                          |                          |                                  |                          |                          |                                   |                          |                          |                                                       |                          |                          |
| 4. Cambios de color en la piel del pecho (como a rojo, café o morado)?                                                                                                                                                                                                                                                                                                                                                                              | <input type="checkbox"/>                                                                                                                                                                                                                                                                                                                                                                                                                                                                                                                                                                                                                                                                                                                                                                                                                                                                                                                                                                                                                                                                                                                                                                                                                                                                                                                                                                                                                                                                                                                                                                                                                                                                                                                                                                                                                                                                                                                                                                                                                                                                                                                                                                                                                                                                                                                                                                                                                                                                               | <input type="checkbox"/> |    |    |                                         |                          |                          |                       |                          |                          |                                                          |                          |                          |                                                                        |                          |                          |                                                         |                          |                          |                                         |                          |                          |                         |                          |                          |                                  |                          |                          |                                   |                          |                          |                                                       |                          |                          |
| 5. Hormigueo o entumecimiento del brazo del mismo lado?                                                                                                                                                                                                                                                                                                                                                                                             | <input type="checkbox"/>                                                                                                                                                                                                                                                                                                                                                                                                                                                                                                                                                                                                                                                                                                                                                                                                                                                                                                                                                                                                                                                                                                                                                                                                                                                                                                                                                                                                                                                                                                                                                                                                                                                                                                                                                                                                                                                                                                                                                                                                                                                                                                                                                                                                                                                                                                                                                                                                                                                                               | <input type="checkbox"/> |    |    |                                         |                          |                          |                       |                          |                          |                                                          |                          |                          |                                                                        |                          |                          |                                                         |                          |                          |                                         |                          |                          |                         |                          |                          |                                  |                          |                          |                                   |                          |                          |                                                       |                          |                          |
| 6. Úlcera o llaga en la piel del pecho?                                                                                                                                                                                                                                                                                                                                                                                                             | <input type="checkbox"/>                                                                                                                                                                                                                                                                                                                                                                                                                                                                                                                                                                                                                                                                                                                                                                                                                                                                                                                                                                                                                                                                                                                                                                                                                                                                                                                                                                                                                                                                                                                                                                                                                                                                                                                                                                                                                                                                                                                                                                                                                                                                                                                                                                                                                                                                                                                                                                                                                                                                               | <input type="checkbox"/> |    |    |                                         |                          |                          |                       |                          |                          |                                                          |                          |                          |                                                                        |                          |                          |                                                         |                          |                          |                                         |                          |                          |                         |                          |                          |                                  |                          |                          |                                   |                          |                          |                                                       |                          |                          |
| 7. Comezón en el pecho?                                                                                                                                                                                                                                                                                                                                                                                                                             | <input type="checkbox"/>                                                                                                                                                                                                                                                                                                                                                                                                                                                                                                                                                                                                                                                                                                                                                                                                                                                                                                                                                                                                                                                                                                                                                                                                                                                                                                                                                                                                                                                                                                                                                                                                                                                                                                                                                                                                                                                                                                                                                                                                                                                                                                                                                                                                                                                                                                                                                                                                                                                                               | <input type="checkbox"/> |    |    |                                         |                          |                          |                       |                          |                          |                                                          |                          |                          |                                                                        |                          |                          |                                                         |                          |                          |                                         |                          |                          |                         |                          |                          |                                  |                          |                          |                                   |                          |                          |                                                       |                          |                          |
| 8. Aumento del tamaño del pecho?                                                                                                                                                                                                                                                                                                                                                                                                                    | <input type="checkbox"/>                                                                                                                                                                                                                                                                                                                                                                                                                                                                                                                                                                                                                                                                                                                                                                                                                                                                                                                                                                                                                                                                                                                                                                                                                                                                                                                                                                                                                                                                                                                                                                                                                                                                                                                                                                                                                                                                                                                                                                                                                                                                                                                                                                                                                                                                                                                                                                                                                                                                               | <input type="checkbox"/> |    |    |                                         |                          |                          |                       |                          |                          |                                                          |                          |                          |                                                                        |                          |                          |                                                         |                          |                          |                                         |                          |                          |                         |                          |                          |                                  |                          |                          |                                   |                          |                          |                                                       |                          |                          |
| 9. Cambios en la forma del pecho?                                                                                                                                                                                                                                                                                                                                                                                                                   | <input type="checkbox"/>                                                                                                                                                                                                                                                                                                                                                                                                                                                                                                                                                                                                                                                                                                                                                                                                                                                                                                                                                                                                                                                                                                                                                                                                                                                                                                                                                                                                                                                                                                                                                                                                                                                                                                                                                                                                                                                                                                                                                                                                                                                                                                                                                                                                                                                                                                                                                                                                                                                                               | <input type="checkbox"/> |    |    |                                         |                          |                          |                       |                          |                          |                                                          |                          |                          |                                                                        |                          |                          |                                                         |                          |                          |                                         |                          |                          |                         |                          |                          |                                  |                          |                          |                                   |                          |                          |                                                       |                          |                          |
| 10. Que le haya salido líquido o sangre por el pezón?                                                                                                                                                                                                                                                                                                                                                                                               | <input type="checkbox"/>                                                                                                                                                                                                                                                                                                                                                                                                                                                                                                                                                                                                                                                                                                                                                                                                                                                                                                                                                                                                                                                                                                                                                                                                                                                                                                                                                                                                                                                                                                                                                                                                                                                                                                                                                                                                                                                                                                                                                                                                                                                                                                                                                                                                                                                                                                                                                                                                                                                                               | <input type="checkbox"/> |    |    |                                         |                          |                          |                       |                          |                          |                                                          |                          |                          |                                                                        |                          |                          |                                                         |                          |                          |                                         |                          |                          |                         |                          |                          |                                  |                          |                          |                                   |                          |                          |                                                       |                          |                          |
| <p><b>2.02</b> ¿Qué tanto le <b>preocupó</b> en aquel entonces?</p> <p style="text-align: center;"><i>LEA TODAS LAS OPCIONES DE RESPUESTA EN VOZ ALTA</i></p> <p>Nada? ..... 0<br/>                     Poco? ..... 1<br/>                     Regular? ..... 2<br/>                     O mucho? ..... 3<br/>                     No responde ..... 99</p>                                                                                         | <p><b>2.05</b> Y de éstas <b>molestias</b> que me dijo que ha tenido, <i>LEER EN VOZ ALTA MOLESTIAS QUE MENCIONÓ EN PREGUNTA ANTERIOR</i> <b>¿cuál le preocupó más?</b></p> <p style="text-align: center;"><i>RESPONDER EL NÚMERO CORRESPONDIENTE A LA OPCIÓN DEL SÍNTOMA O MOLESTIA MENCIONADO.</i></p> <div style="text-align: center; margin-top: 10px;"> <table border="1" style="display: inline-table; border-collapse: collapse;"> <tr> <td style="width: 20px; height: 20px;"></td> <td style="width: 20px; height: 20px;"></td> </tr> </table> </div>                                                                                                                                                                                                                                                                                                                                                                                                                                                                                                                                                                                                                                                                                                                                                                                                                                                                                                                                                                                                                                                                                                                                                                                                                                                                                                                                                                                                                                                                                                                                                                                                                                                                                                                                                                                                                                                                                                                                         |                          |    |    |                                         |                          |                          |                       |                          |                          |                                                          |                          |                          |                                                                        |                          |                          |                                                         |                          |                          |                                         |                          |                          |                         |                          |                          |                                  |                          |                          |                                   |                          |                          |                                                       |                          |                          |
|                                                                                                                                                                                                                                                                                                                                                                                                                                                     |                                                                                                                                                                                                                                                                                                                                                                                                                                                                                                                                                                                                                                                                                                                                                                                                                                                                                                                                                                                                                                                                                                                                                                                                                                                                                                                                                                                                                                                                                                                                                                                                                                                                                                                                                                                                                                                                                                                                                                                                                                                                                                                                                                                                                                                                                                                                                                                                                                                                                                        |                          |    |    |                                         |                          |                          |                       |                          |                          |                                                          |                          |                          |                                                                        |                          |                          |                                                         |                          |                          |                                         |                          |                          |                         |                          |                          |                                  |                          |                          |                                   |                          |                          |                                                       |                          |                          |
| <p><b>2.03</b> Cuando lo notó por primera vez <b>¿pensó</b> que podía tratarse de <b>cáncer</b>?</p> <p>Sí..... 1<br/>                     No..... 0<br/>                     No responde ..... 99</p>                                                                                                                                                                                                                                              |                                                                                                                                                                                                                                                                                                                                                                                                                                                                                                                                                                                                                                                                                                                                                                                                                                                                                                                                                                                                                                                                                                                                                                                                                                                                                                                                                                                                                                                                                                                                                                                                                                                                                                                                                                                                                                                                                                                                                                                                                                                                                                                                                                                                                                                                                                                                                                                                                                                                                                        |                          |    |    |                                         |                          |                          |                       |                          |                          |                                                          |                          |                          |                                                                        |                          |                          |                                                         |                          |                          |                                         |                          |                          |                         |                          |                          |                                  |                          |                          |                                   |                          |                          |                                                       |                          |                          |

*Se permite su reproducción y uso sólo con fines de investigación. Favor de citar la referencia como se indica:*

*The reproduction of this instrument is permitted for research use only. Please cite the reference appropriately as follows:*

Unger-Saldaña K, Pelaez-Ballestas I & Infante-Castañeda C. **Development and validation of a questionnaire to assess breast cancer delay.** *BMC Cancer*, 2012;**12**:626.

## BÚSQUEDA DE ATENCIÓN MÉDICA DE PACIENTES QUE ACUDEN AL DEPARTAMENTO DE TUMORES MAMARIOS DEL INCAN

### 2. PERCEPCIÓN DE LAS MOLESTIAS (Continuación)

| <p><b>2.06</b> ¿Qué fue lo que la hizo <b>decidir ir a atenderse con un médico?</b></p> <p style="text-align: center;"><i>LEER OPCIONES DE RESPUESTA EN VOZ ALTA.</i></p> <p>Que apareciera <i>molestia (2.05)?</i> ..... 1</p> <p>Que empeorara <i>molestia (2.05)?</i> ..... 2</p> <p>Que pasara el tiempo y no se le quitara <i>molestia (2.05)?</i> ..... 3</p> <p>Que <i>molestia (2.05)</i> interfiriera con algunas de sus actividades habituales? ..... 4</p> <p>Consejos familiares o de su red social? ..... 5</p> <p>O alguna otra cosa? ..... 6<br/><i>ESPECIFICAR</i></p> <p>No responde ..... 99</p>                                                                                                                                                                                                                                                                                                                                                                                                                                                                                                                                                                                                                                                                                                                                                                                                                                                                                                                                                                                                                                                                                                                                                                                                                                                                                                                                                                                                                                                                                                                                                                                                                                                                                                                                                                                                                                                                                                                                      |                          | <p><b>2.09</b> ¿Cómo siente que fue el tiempo que pasó entre la primera vez que fue al médico para este problema de salud y llegó a este hospital?</p> <p>Siente que fue...</p> <p style="text-align: center;"><i>(REPETIR ESTA ÚLTIMA FRASE EN VOZ ALTA ANTES DE CADA OPCIÓN DE RESPUESTA)</i></p> <p>Muy poco tiempo? ..... 1</p> <p>Poco tiempo? ..... 2</p> <p>Regular (más o menos)? ..... 3</p> <p>Mucho tiempo? ..... 4</p> <p>No responde ..... 99</p>                                                                                                                                                                                                                                                                                                                                                                                                                                                                                                                                                                                                                                                                                                                                                                                                                                                                                                                                                                                                                                                                                                                                                                                                                                                                                                                                                                                                                                                                                                                                                                                                                                                                                                                                                                                                                                                                                                                                                                                                              | <b>PASE<br/>A 3.01</b> |                                                             |                          |                                                                        |                                                              |                          |                                                                    |                                                                  |                          |                                                                              |                                               |                          |                                                                                      |                                                                             |                          |                                                       |                                |                          |                               |                          |                          |                                                                        |                                      |                          |                                |                                     |                          |                          |                    |  |                                                                                                                                                                                                                                                                                                                                                                                                                                                                                       |  |
|---------------------------------------------------------------------------------------------------------------------------------------------------------------------------------------------------------------------------------------------------------------------------------------------------------------------------------------------------------------------------------------------------------------------------------------------------------------------------------------------------------------------------------------------------------------------------------------------------------------------------------------------------------------------------------------------------------------------------------------------------------------------------------------------------------------------------------------------------------------------------------------------------------------------------------------------------------------------------------------------------------------------------------------------------------------------------------------------------------------------------------------------------------------------------------------------------------------------------------------------------------------------------------------------------------------------------------------------------------------------------------------------------------------------------------------------------------------------------------------------------------------------------------------------------------------------------------------------------------------------------------------------------------------------------------------------------------------------------------------------------------------------------------------------------------------------------------------------------------------------------------------------------------------------------------------------------------------------------------------------------------------------------------------------------------------------------------------------------------------------------------------------------------------------------------------------------------------------------------------------------------------------------------------------------------------------------------------------------------------------------------------------------------------------------------------------------------------------------------------------------------------------------------------------------------|--------------------------|-----------------------------------------------------------------------------------------------------------------------------------------------------------------------------------------------------------------------------------------------------------------------------------------------------------------------------------------------------------------------------------------------------------------------------------------------------------------------------------------------------------------------------------------------------------------------------------------------------------------------------------------------------------------------------------------------------------------------------------------------------------------------------------------------------------------------------------------------------------------------------------------------------------------------------------------------------------------------------------------------------------------------------------------------------------------------------------------------------------------------------------------------------------------------------------------------------------------------------------------------------------------------------------------------------------------------------------------------------------------------------------------------------------------------------------------------------------------------------------------------------------------------------------------------------------------------------------------------------------------------------------------------------------------------------------------------------------------------------------------------------------------------------------------------------------------------------------------------------------------------------------------------------------------------------------------------------------------------------------------------------------------------------------------------------------------------------------------------------------------------------------------------------------------------------------------------------------------------------------------------------------------------------------------------------------------------------------------------------------------------------------------------------------------------------------------------------------------------------|------------------------|-------------------------------------------------------------|--------------------------|------------------------------------------------------------------------|--------------------------------------------------------------|--------------------------|--------------------------------------------------------------------|------------------------------------------------------------------|--------------------------|------------------------------------------------------------------------------|-----------------------------------------------|--------------------------|--------------------------------------------------------------------------------------|-----------------------------------------------------------------------------|--------------------------|-------------------------------------------------------|--------------------------------|--------------------------|-------------------------------|--------------------------|--------------------------|------------------------------------------------------------------------|--------------------------------------|--------------------------|--------------------------------|-------------------------------------|--------------------------|--------------------------|--------------------|--|---------------------------------------------------------------------------------------------------------------------------------------------------------------------------------------------------------------------------------------------------------------------------------------------------------------------------------------------------------------------------------------------------------------------------------------------------------------------------------------|--|
| <p><b>2.07</b> ¿Cómo siente que fue el tiempo que pasó <b>entre que se dio cuenta por primera vez de (primer síntoma que tuvo) y fue por primera vez con el médico?</b></p> <p style="text-align: center;"><i>LEER EN VOZ ALTA OPCIONES DE RESPUESTA</i></p> <p>Siente que usted buscó atención...</p> <p>Inmediatamente (luego luego)? ..... 1</p> <p>Fue pronto, pero no de inmediato? ..... 2</p> <p>Se tardó un poco? ..... 3</p> <p>O se tardó mucho? ..... 4</p> <p>No responde ..... 99</p>                                                                                                                                                                                                                                                                                                                                                                                                                                                                                                                                                                                                                                                                                                                                                                                                                                                                                                                                                                                                                                                                                                                                                                                                                                                                                                                                                                                                                                                                                                                                                                                                                                                                                                                                                                                                                                                                                                                                                                                                                                                      | <b>PASE<br/>A 2.09</b>   | <p><b>2.10</b> De las <b>cosas</b> que ahora le voy a leer, ¿<b>Cuáles</b> cree usted que hicieron que <b>no pudiera</b> llegar aquí más pronto? <b>Se las voy a decir</b> y usted me va respondiendo "sí" o "no" para cada una.</p> <p>Siente que le dificultó llegar a este hospital más pronto....</p> <p style="text-align: center;"><i>(LEER CADA OPCIÓN DE RESPUESTA EN VOZ ALTA, ANTECEDIDA POR LA FRASE DE ARRIBA)</i></p> <table style="width: 100%; border-collapse: collapse;"> <thead> <tr> <th style="width: 80%;"></th> <th style="width: 10%; text-align: center;">SÍ</th> <th style="width: 10%; text-align: center;">NO</th> </tr> </thead> <tbody> <tr> <td>1. ... El no contar con información de servicios a donde podía acudir?</td> <td style="text-align: center;"><input type="checkbox"/></td> <td style="text-align: center;"><input type="checkbox"/></td> </tr> <tr> <td>2. ... La falta de dinero para pagar las consultas y los estudios?</td> <td style="text-align: center;"><input type="checkbox"/></td> <td style="text-align: center;"><input type="checkbox"/></td> </tr> <tr> <td>3. ... Que le daban las citas para el médico y/o los estudios muy apartadas?</td> <td style="text-align: center;"><input type="checkbox"/></td> <td style="text-align: center;"><input type="checkbox"/></td> </tr> <tr> <td>4. ... Que hubo un diagnóstico equivocado de los médicos que la vieron al principio?</td> <td style="text-align: center;"><input type="checkbox"/></td> <td style="text-align: center;"><input type="checkbox"/></td> </tr> <tr> <td>5. ... Que no podía faltar al trabajo para atenderse?</td> <td style="text-align: center;"><input type="checkbox"/></td> <td style="text-align: center;"><input type="checkbox"/></td> </tr> <tr> <td>6. ... Que usted tenía miedo?</td> <td style="text-align: center;"><input type="checkbox"/></td> <td style="text-align: center;"><input type="checkbox"/></td> </tr> <tr> <td>7. ... Que tenía que atender a un familiar enfermo o de edad avanzada?</td> <td style="text-align: center;"><input type="checkbox"/></td> <td style="text-align: center;"><input type="checkbox"/></td> </tr> <tr> <td>8. ... Alguna otra cosa? _____</td> <td style="text-align: center;"><input type="checkbox"/></td> <td style="text-align: center;"><input type="checkbox"/></td> </tr> <tr> <td colspan="3" style="text-align: center;"><i>ESPECIFICAR</i></td> </tr> </tbody> </table> |                        | SÍ                                                          | NO                       | 1. ... El no contar con información de servicios a donde podía acudir? | <input type="checkbox"/>                                     | <input type="checkbox"/> | 2. ... La falta de dinero para pagar las consultas y los estudios? | <input type="checkbox"/>                                         | <input type="checkbox"/> | 3. ... Que le daban las citas para el médico y/o los estudios muy apartadas? | <input type="checkbox"/>                      | <input type="checkbox"/> | 4. ... Que hubo un diagnóstico equivocado de los médicos que la vieron al principio? | <input type="checkbox"/>                                                    | <input type="checkbox"/> | 5. ... Que no podía faltar al trabajo para atenderse? | <input type="checkbox"/>       | <input type="checkbox"/> | 6. ... Que usted tenía miedo? | <input type="checkbox"/> | <input type="checkbox"/> | 7. ... Que tenía que atender a un familiar enfermo o de edad avanzada? | <input type="checkbox"/>             | <input type="checkbox"/> | 8. ... Alguna otra cosa? _____ | <input type="checkbox"/>            | <input type="checkbox"/> | <i>ESPECIFICAR</i>       |                    |  | <p style="font-size: small; text-align: center;">Se permite su reproducción y uso sólo con fines de investigación. Favor de citar la referencia como se indica:<br/>The reproduction of this instrument is permitted for research use only. Please cite the reference appropriately as follows:<br/>Unger-Saldaña K, Peláez-Ballesteros I &amp; Infante-Castañeda C. <b>Development and validation of a questionnaire to assess breast cancer delay.</b> BMC Cancer, 2012;12:626.</p> |  |
|                                                                                                                                                                                                                                                                                                                                                                                                                                                                                                                                                                                                                                                                                                                                                                                                                                                                                                                                                                                                                                                                                                                                                                                                                                                                                                                                                                                                                                                                                                                                                                                                                                                                                                                                                                                                                                                                                                                                                                                                                                                                                                                                                                                                                                                                                                                                                                                                                                                                                                                                                         | SÍ                       | NO                                                                                                                                                                                                                                                                                                                                                                                                                                                                                                                                                                                                                                                                                                                                                                                                                                                                                                                                                                                                                                                                                                                                                                                                                                                                                                                                                                                                                                                                                                                                                                                                                                                                                                                                                                                                                                                                                                                                                                                                                                                                                                                                                                                                                                                                                                                                                                                                                                                                          |                        |                                                             |                          |                                                                        |                                                              |                          |                                                                    |                                                                  |                          |                                                                              |                                               |                          |                                                                                      |                                                                             |                          |                                                       |                                |                          |                               |                          |                          |                                                                        |                                      |                          |                                |                                     |                          |                          |                    |  |                                                                                                                                                                                                                                                                                                                                                                                                                                                                                       |  |
| 1. ... El no contar con información de servicios a donde podía acudir?                                                                                                                                                                                                                                                                                                                                                                                                                                                                                                                                                                                                                                                                                                                                                                                                                                                                                                                                                                                                                                                                                                                                                                                                                                                                                                                                                                                                                                                                                                                                                                                                                                                                                                                                                                                                                                                                                                                                                                                                                                                                                                                                                                                                                                                                                                                                                                                                                                                                                  | <input type="checkbox"/> | <input type="checkbox"/>                                                                                                                                                                                                                                                                                                                                                                                                                                                                                                                                                                                                                                                                                                                                                                                                                                                                                                                                                                                                                                                                                                                                                                                                                                                                                                                                                                                                                                                                                                                                                                                                                                                                                                                                                                                                                                                                                                                                                                                                                                                                                                                                                                                                                                                                                                                                                                                                                                                    |                        |                                                             |                          |                                                                        |                                                              |                          |                                                                    |                                                                  |                          |                                                                              |                                               |                          |                                                                                      |                                                                             |                          |                                                       |                                |                          |                               |                          |                          |                                                                        |                                      |                          |                                |                                     |                          |                          |                    |  |                                                                                                                                                                                                                                                                                                                                                                                                                                                                                       |  |
| 2. ... La falta de dinero para pagar las consultas y los estudios?                                                                                                                                                                                                                                                                                                                                                                                                                                                                                                                                                                                                                                                                                                                                                                                                                                                                                                                                                                                                                                                                                                                                                                                                                                                                                                                                                                                                                                                                                                                                                                                                                                                                                                                                                                                                                                                                                                                                                                                                                                                                                                                                                                                                                                                                                                                                                                                                                                                                                      | <input type="checkbox"/> | <input type="checkbox"/>                                                                                                                                                                                                                                                                                                                                                                                                                                                                                                                                                                                                                                                                                                                                                                                                                                                                                                                                                                                                                                                                                                                                                                                                                                                                                                                                                                                                                                                                                                                                                                                                                                                                                                                                                                                                                                                                                                                                                                                                                                                                                                                                                                                                                                                                                                                                                                                                                                                    |                        |                                                             |                          |                                                                        |                                                              |                          |                                                                    |                                                                  |                          |                                                                              |                                               |                          |                                                                                      |                                                                             |                          |                                                       |                                |                          |                               |                          |                          |                                                                        |                                      |                          |                                |                                     |                          |                          |                    |  |                                                                                                                                                                                                                                                                                                                                                                                                                                                                                       |  |
| 3. ... Que le daban las citas para el médico y/o los estudios muy apartadas?                                                                                                                                                                                                                                                                                                                                                                                                                                                                                                                                                                                                                                                                                                                                                                                                                                                                                                                                                                                                                                                                                                                                                                                                                                                                                                                                                                                                                                                                                                                                                                                                                                                                                                                                                                                                                                                                                                                                                                                                                                                                                                                                                                                                                                                                                                                                                                                                                                                                            | <input type="checkbox"/> | <input type="checkbox"/>                                                                                                                                                                                                                                                                                                                                                                                                                                                                                                                                                                                                                                                                                                                                                                                                                                                                                                                                                                                                                                                                                                                                                                                                                                                                                                                                                                                                                                                                                                                                                                                                                                                                                                                                                                                                                                                                                                                                                                                                                                                                                                                                                                                                                                                                                                                                                                                                                                                    |                        |                                                             |                          |                                                                        |                                                              |                          |                                                                    |                                                                  |                          |                                                                              |                                               |                          |                                                                                      |                                                                             |                          |                                                       |                                |                          |                               |                          |                          |                                                                        |                                      |                          |                                |                                     |                          |                          |                    |  |                                                                                                                                                                                                                                                                                                                                                                                                                                                                                       |  |
| 4. ... Que hubo un diagnóstico equivocado de los médicos que la vieron al principio?                                                                                                                                                                                                                                                                                                                                                                                                                                                                                                                                                                                                                                                                                                                                                                                                                                                                                                                                                                                                                                                                                                                                                                                                                                                                                                                                                                                                                                                                                                                                                                                                                                                                                                                                                                                                                                                                                                                                                                                                                                                                                                                                                                                                                                                                                                                                                                                                                                                                    | <input type="checkbox"/> | <input type="checkbox"/>                                                                                                                                                                                                                                                                                                                                                                                                                                                                                                                                                                                                                                                                                                                                                                                                                                                                                                                                                                                                                                                                                                                                                                                                                                                                                                                                                                                                                                                                                                                                                                                                                                                                                                                                                                                                                                                                                                                                                                                                                                                                                                                                                                                                                                                                                                                                                                                                                                                    |                        |                                                             |                          |                                                                        |                                                              |                          |                                                                    |                                                                  |                          |                                                                              |                                               |                          |                                                                                      |                                                                             |                          |                                                       |                                |                          |                               |                          |                          |                                                                        |                                      |                          |                                |                                     |                          |                          |                    |  |                                                                                                                                                                                                                                                                                                                                                                                                                                                                                       |  |
| 5. ... Que no podía faltar al trabajo para atenderse?                                                                                                                                                                                                                                                                                                                                                                                                                                                                                                                                                                                                                                                                                                                                                                                                                                                                                                                                                                                                                                                                                                                                                                                                                                                                                                                                                                                                                                                                                                                                                                                                                                                                                                                                                                                                                                                                                                                                                                                                                                                                                                                                                                                                                                                                                                                                                                                                                                                                                                   | <input type="checkbox"/> | <input type="checkbox"/>                                                                                                                                                                                                                                                                                                                                                                                                                                                                                                                                                                                                                                                                                                                                                                                                                                                                                                                                                                                                                                                                                                                                                                                                                                                                                                                                                                                                                                                                                                                                                                                                                                                                                                                                                                                                                                                                                                                                                                                                                                                                                                                                                                                                                                                                                                                                                                                                                                                    |                        |                                                             |                          |                                                                        |                                                              |                          |                                                                    |                                                                  |                          |                                                                              |                                               |                          |                                                                                      |                                                                             |                          |                                                       |                                |                          |                               |                          |                          |                                                                        |                                      |                          |                                |                                     |                          |                          |                    |  |                                                                                                                                                                                                                                                                                                                                                                                                                                                                                       |  |
| 6. ... Que usted tenía miedo?                                                                                                                                                                                                                                                                                                                                                                                                                                                                                                                                                                                                                                                                                                                                                                                                                                                                                                                                                                                                                                                                                                                                                                                                                                                                                                                                                                                                                                                                                                                                                                                                                                                                                                                                                                                                                                                                                                                                                                                                                                                                                                                                                                                                                                                                                                                                                                                                                                                                                                                           | <input type="checkbox"/> | <input type="checkbox"/>                                                                                                                                                                                                                                                                                                                                                                                                                                                                                                                                                                                                                                                                                                                                                                                                                                                                                                                                                                                                                                                                                                                                                                                                                                                                                                                                                                                                                                                                                                                                                                                                                                                                                                                                                                                                                                                                                                                                                                                                                                                                                                                                                                                                                                                                                                                                                                                                                                                    |                        |                                                             |                          |                                                                        |                                                              |                          |                                                                    |                                                                  |                          |                                                                              |                                               |                          |                                                                                      |                                                                             |                          |                                                       |                                |                          |                               |                          |                          |                                                                        |                                      |                          |                                |                                     |                          |                          |                    |  |                                                                                                                                                                                                                                                                                                                                                                                                                                                                                       |  |
| 7. ... Que tenía que atender a un familiar enfermo o de edad avanzada?                                                                                                                                                                                                                                                                                                                                                                                                                                                                                                                                                                                                                                                                                                                                                                                                                                                                                                                                                                                                                                                                                                                                                                                                                                                                                                                                                                                                                                                                                                                                                                                                                                                                                                                                                                                                                                                                                                                                                                                                                                                                                                                                                                                                                                                                                                                                                                                                                                                                                  | <input type="checkbox"/> | <input type="checkbox"/>                                                                                                                                                                                                                                                                                                                                                                                                                                                                                                                                                                                                                                                                                                                                                                                                                                                                                                                                                                                                                                                                                                                                                                                                                                                                                                                                                                                                                                                                                                                                                                                                                                                                                                                                                                                                                                                                                                                                                                                                                                                                                                                                                                                                                                                                                                                                                                                                                                                    |                        |                                                             |                          |                                                                        |                                                              |                          |                                                                    |                                                                  |                          |                                                                              |                                               |                          |                                                                                      |                                                                             |                          |                                                       |                                |                          |                               |                          |                          |                                                                        |                                      |                          |                                |                                     |                          |                          |                    |  |                                                                                                                                                                                                                                                                                                                                                                                                                                                                                       |  |
| 8. ... Alguna otra cosa? _____                                                                                                                                                                                                                                                                                                                                                                                                                                                                                                                                                                                                                                                                                                                                                                                                                                                                                                                                                                                                                                                                                                                                                                                                                                                                                                                                                                                                                                                                                                                                                                                                                                                                                                                                                                                                                                                                                                                                                                                                                                                                                                                                                                                                                                                                                                                                                                                                                                                                                                                          | <input type="checkbox"/> | <input type="checkbox"/>                                                                                                                                                                                                                                                                                                                                                                                                                                                                                                                                                                                                                                                                                                                                                                                                                                                                                                                                                                                                                                                                                                                                                                                                                                                                                                                                                                                                                                                                                                                                                                                                                                                                                                                                                                                                                                                                                                                                                                                                                                                                                                                                                                                                                                                                                                                                                                                                                                                    |                        |                                                             |                          |                                                                        |                                                              |                          |                                                                    |                                                                  |                          |                                                                              |                                               |                          |                                                                                      |                                                                             |                          |                                                       |                                |                          |                               |                          |                          |                                                                        |                                      |                          |                                |                                     |                          |                          |                    |  |                                                                                                                                                                                                                                                                                                                                                                                                                                                                                       |  |
| <i>ESPECIFICAR</i>                                                                                                                                                                                                                                                                                                                                                                                                                                                                                                                                                                                                                                                                                                                                                                                                                                                                                                                                                                                                                                                                                                                                                                                                                                                                                                                                                                                                                                                                                                                                                                                                                                                                                                                                                                                                                                                                                                                                                                                                                                                                                                                                                                                                                                                                                                                                                                                                                                                                                                                                      |                          |                                                                                                                                                                                                                                                                                                                                                                                                                                                                                                                                                                                                                                                                                                                                                                                                                                                                                                                                                                                                                                                                                                                                                                                                                                                                                                                                                                                                                                                                                                                                                                                                                                                                                                                                                                                                                                                                                                                                                                                                                                                                                                                                                                                                                                                                                                                                                                                                                                                                             |                        |                                                             |                          |                                                                        |                                                              |                          |                                                                    |                                                                  |                          |                                                                              |                                               |                          |                                                                                      |                                                                             |                          |                                                       |                                |                          |                               |                          |                          |                                                                        |                                      |                          |                                |                                     |                          |                          |                    |  |                                                                                                                                                                                                                                                                                                                                                                                                                                                                                       |  |
| <p><b>2.08</b> ¿Por qué no buscó atención más pronto? Le voy a leer diferentes opciones y usted me va respondiendo para cada una "sí" o "no".</p> <p>No buscó atención médica más pronto...</p> <p style="text-align: center;"><i>(LEER EN VOZ ALTA LA FRASE ANTERIOR ANTES DE LEER LA PRIMERA OPCIÓN DE RESPUESTA Y ANTES DE LEER LA OPCIÓN DE RESPUESTA 5. PARA EL RESTO, SÓLO LEER LA OPCIÓN DE RESPUESTA.)</i></p> <table style="width: 100%; border-collapse: collapse;"> <thead> <tr> <th style="width: 80%;"></th> <th style="width: 10%; text-align: center;">SÍ</th> <th style="width: 10%; text-align: center;">NO</th> </tr> </thead> <tbody> <tr> <td>1. ... Porque pensó que el problema iba a desaparecer solo?</td> <td style="text-align: center;"><input type="checkbox"/></td> <td style="text-align: center;"><input type="checkbox"/></td> </tr> <tr> <td>2. ... Porque no sabía a qué servicio de salud podía acudir?</td> <td style="text-align: center;"><input type="checkbox"/></td> <td style="text-align: center;"><input type="checkbox"/></td> </tr> <tr> <td>3. ... Por falta de dinero para utilizar los servicios de salud?</td> <td style="text-align: center;"><input type="checkbox"/></td> <td style="text-align: center;"><input type="checkbox"/></td> </tr> <tr> <td>4. ... Por dificultad para dejar de trabajar?</td> <td style="text-align: center;"><input type="checkbox"/></td> <td style="text-align: center;"><input type="checkbox"/></td> </tr> <tr> <td>5. ... Porque tiene que cuidar de un familiar (niños, ancianos o enfermos)?</td> <td style="text-align: center;"><input type="checkbox"/></td> <td style="text-align: center;"><input type="checkbox"/></td> </tr> <tr> <td>6. ... Por desidia o descuido?</td> <td style="text-align: center;"><input type="checkbox"/></td> <td style="text-align: center;"><input type="checkbox"/></td> </tr> <tr> <td>7. ... Por miedo?</td> <td style="text-align: center;"><input type="checkbox"/></td> <td style="text-align: center;"><input type="checkbox"/></td> </tr> <tr> <td>8. ... Por pena de que la revisaran?</td> <td style="text-align: center;"><input type="checkbox"/></td> <td style="text-align: center;"><input type="checkbox"/></td> </tr> <tr> <td>9. ... Por algún otro motivo? _____</td> <td style="text-align: center;"><input type="checkbox"/></td> <td style="text-align: center;"><input type="checkbox"/></td> </tr> <tr> <td colspan="3" style="text-align: center;"><i>ESPECIFICAR</i></td> </tr> </tbody> </table> |                          | SÍ                                                                                                                                                                                                                                                                                                                                                                                                                                                                                                                                                                                                                                                                                                                                                                                                                                                                                                                                                                                                                                                                                                                                                                                                                                                                                                                                                                                                                                                                                                                                                                                                                                                                                                                                                                                                                                                                                                                                                                                                                                                                                                                                                                                                                                                                                                                                                                                                                                                                          | NO                     | 1. ... Porque pensó que el problema iba a desaparecer solo? | <input type="checkbox"/> | <input type="checkbox"/>                                               | 2. ... Porque no sabía a qué servicio de salud podía acudir? | <input type="checkbox"/> | <input type="checkbox"/>                                           | 3. ... Por falta de dinero para utilizar los servicios de salud? | <input type="checkbox"/> | <input type="checkbox"/>                                                     | 4. ... Por dificultad para dejar de trabajar? | <input type="checkbox"/> | <input type="checkbox"/>                                                             | 5. ... Porque tiene que cuidar de un familiar (niños, ancianos o enfermos)? | <input type="checkbox"/> | <input type="checkbox"/>                              | 6. ... Por desidia o descuido? | <input type="checkbox"/> | <input type="checkbox"/>      | 7. ... Por miedo?        | <input type="checkbox"/> | <input type="checkbox"/>                                               | 8. ... Por pena de que la revisaran? | <input type="checkbox"/> | <input type="checkbox"/>       | 9. ... Por algún otro motivo? _____ | <input type="checkbox"/> | <input type="checkbox"/> | <i>ESPECIFICAR</i> |  |                                                                                                                                                                                                                                                                                                                                                                                                                                                                                       |  |
|                                                                                                                                                                                                                                                                                                                                                                                                                                                                                                                                                                                                                                                                                                                                                                                                                                                                                                                                                                                                                                                                                                                                                                                                                                                                                                                                                                                                                                                                                                                                                                                                                                                                                                                                                                                                                                                                                                                                                                                                                                                                                                                                                                                                                                                                                                                                                                                                                                                                                                                                                         | SÍ                       | NO                                                                                                                                                                                                                                                                                                                                                                                                                                                                                                                                                                                                                                                                                                                                                                                                                                                                                                                                                                                                                                                                                                                                                                                                                                                                                                                                                                                                                                                                                                                                                                                                                                                                                                                                                                                                                                                                                                                                                                                                                                                                                                                                                                                                                                                                                                                                                                                                                                                                          |                        |                                                             |                          |                                                                        |                                                              |                          |                                                                    |                                                                  |                          |                                                                              |                                               |                          |                                                                                      |                                                                             |                          |                                                       |                                |                          |                               |                          |                          |                                                                        |                                      |                          |                                |                                     |                          |                          |                    |  |                                                                                                                                                                                                                                                                                                                                                                                                                                                                                       |  |
| 1. ... Porque pensó que el problema iba a desaparecer solo?                                                                                                                                                                                                                                                                                                                                                                                                                                                                                                                                                                                                                                                                                                                                                                                                                                                                                                                                                                                                                                                                                                                                                                                                                                                                                                                                                                                                                                                                                                                                                                                                                                                                                                                                                                                                                                                                                                                                                                                                                                                                                                                                                                                                                                                                                                                                                                                                                                                                                             | <input type="checkbox"/> | <input type="checkbox"/>                                                                                                                                                                                                                                                                                                                                                                                                                                                                                                                                                                                                                                                                                                                                                                                                                                                                                                                                                                                                                                                                                                                                                                                                                                                                                                                                                                                                                                                                                                                                                                                                                                                                                                                                                                                                                                                                                                                                                                                                                                                                                                                                                                                                                                                                                                                                                                                                                                                    |                        |                                                             |                          |                                                                        |                                                              |                          |                                                                    |                                                                  |                          |                                                                              |                                               |                          |                                                                                      |                                                                             |                          |                                                       |                                |                          |                               |                          |                          |                                                                        |                                      |                          |                                |                                     |                          |                          |                    |  |                                                                                                                                                                                                                                                                                                                                                                                                                                                                                       |  |
| 2. ... Porque no sabía a qué servicio de salud podía acudir?                                                                                                                                                                                                                                                                                                                                                                                                                                                                                                                                                                                                                                                                                                                                                                                                                                                                                                                                                                                                                                                                                                                                                                                                                                                                                                                                                                                                                                                                                                                                                                                                                                                                                                                                                                                                                                                                                                                                                                                                                                                                                                                                                                                                                                                                                                                                                                                                                                                                                            | <input type="checkbox"/> | <input type="checkbox"/>                                                                                                                                                                                                                                                                                                                                                                                                                                                                                                                                                                                                                                                                                                                                                                                                                                                                                                                                                                                                                                                                                                                                                                                                                                                                                                                                                                                                                                                                                                                                                                                                                                                                                                                                                                                                                                                                                                                                                                                                                                                                                                                                                                                                                                                                                                                                                                                                                                                    |                        |                                                             |                          |                                                                        |                                                              |                          |                                                                    |                                                                  |                          |                                                                              |                                               |                          |                                                                                      |                                                                             |                          |                                                       |                                |                          |                               |                          |                          |                                                                        |                                      |                          |                                |                                     |                          |                          |                    |  |                                                                                                                                                                                                                                                                                                                                                                                                                                                                                       |  |
| 3. ... Por falta de dinero para utilizar los servicios de salud?                                                                                                                                                                                                                                                                                                                                                                                                                                                                                                                                                                                                                                                                                                                                                                                                                                                                                                                                                                                                                                                                                                                                                                                                                                                                                                                                                                                                                                                                                                                                                                                                                                                                                                                                                                                                                                                                                                                                                                                                                                                                                                                                                                                                                                                                                                                                                                                                                                                                                        | <input type="checkbox"/> | <input type="checkbox"/>                                                                                                                                                                                                                                                                                                                                                                                                                                                                                                                                                                                                                                                                                                                                                                                                                                                                                                                                                                                                                                                                                                                                                                                                                                                                                                                                                                                                                                                                                                                                                                                                                                                                                                                                                                                                                                                                                                                                                                                                                                                                                                                                                                                                                                                                                                                                                                                                                                                    |                        |                                                             |                          |                                                                        |                                                              |                          |                                                                    |                                                                  |                          |                                                                              |                                               |                          |                                                                                      |                                                                             |                          |                                                       |                                |                          |                               |                          |                          |                                                                        |                                      |                          |                                |                                     |                          |                          |                    |  |                                                                                                                                                                                                                                                                                                                                                                                                                                                                                       |  |
| 4. ... Por dificultad para dejar de trabajar?                                                                                                                                                                                                                                                                                                                                                                                                                                                                                                                                                                                                                                                                                                                                                                                                                                                                                                                                                                                                                                                                                                                                                                                                                                                                                                                                                                                                                                                                                                                                                                                                                                                                                                                                                                                                                                                                                                                                                                                                                                                                                                                                                                                                                                                                                                                                                                                                                                                                                                           | <input type="checkbox"/> | <input type="checkbox"/>                                                                                                                                                                                                                                                                                                                                                                                                                                                                                                                                                                                                                                                                                                                                                                                                                                                                                                                                                                                                                                                                                                                                                                                                                                                                                                                                                                                                                                                                                                                                                                                                                                                                                                                                                                                                                                                                                                                                                                                                                                                                                                                                                                                                                                                                                                                                                                                                                                                    |                        |                                                             |                          |                                                                        |                                                              |                          |                                                                    |                                                                  |                          |                                                                              |                                               |                          |                                                                                      |                                                                             |                          |                                                       |                                |                          |                               |                          |                          |                                                                        |                                      |                          |                                |                                     |                          |                          |                    |  |                                                                                                                                                                                                                                                                                                                                                                                                                                                                                       |  |
| 5. ... Porque tiene que cuidar de un familiar (niños, ancianos o enfermos)?                                                                                                                                                                                                                                                                                                                                                                                                                                                                                                                                                                                                                                                                                                                                                                                                                                                                                                                                                                                                                                                                                                                                                                                                                                                                                                                                                                                                                                                                                                                                                                                                                                                                                                                                                                                                                                                                                                                                                                                                                                                                                                                                                                                                                                                                                                                                                                                                                                                                             | <input type="checkbox"/> | <input type="checkbox"/>                                                                                                                                                                                                                                                                                                                                                                                                                                                                                                                                                                                                                                                                                                                                                                                                                                                                                                                                                                                                                                                                                                                                                                                                                                                                                                                                                                                                                                                                                                                                                                                                                                                                                                                                                                                                                                                                                                                                                                                                                                                                                                                                                                                                                                                                                                                                                                                                                                                    |                        |                                                             |                          |                                                                        |                                                              |                          |                                                                    |                                                                  |                          |                                                                              |                                               |                          |                                                                                      |                                                                             |                          |                                                       |                                |                          |                               |                          |                          |                                                                        |                                      |                          |                                |                                     |                          |                          |                    |  |                                                                                                                                                                                                                                                                                                                                                                                                                                                                                       |  |
| 6. ... Por desidia o descuido?                                                                                                                                                                                                                                                                                                                                                                                                                                                                                                                                                                                                                                                                                                                                                                                                                                                                                                                                                                                                                                                                                                                                                                                                                                                                                                                                                                                                                                                                                                                                                                                                                                                                                                                                                                                                                                                                                                                                                                                                                                                                                                                                                                                                                                                                                                                                                                                                                                                                                                                          | <input type="checkbox"/> | <input type="checkbox"/>                                                                                                                                                                                                                                                                                                                                                                                                                                                                                                                                                                                                                                                                                                                                                                                                                                                                                                                                                                                                                                                                                                                                                                                                                                                                                                                                                                                                                                                                                                                                                                                                                                                                                                                                                                                                                                                                                                                                                                                                                                                                                                                                                                                                                                                                                                                                                                                                                                                    |                        |                                                             |                          |                                                                        |                                                              |                          |                                                                    |                                                                  |                          |                                                                              |                                               |                          |                                                                                      |                                                                             |                          |                                                       |                                |                          |                               |                          |                          |                                                                        |                                      |                          |                                |                                     |                          |                          |                    |  |                                                                                                                                                                                                                                                                                                                                                                                                                                                                                       |  |
| 7. ... Por miedo?                                                                                                                                                                                                                                                                                                                                                                                                                                                                                                                                                                                                                                                                                                                                                                                                                                                                                                                                                                                                                                                                                                                                                                                                                                                                                                                                                                                                                                                                                                                                                                                                                                                                                                                                                                                                                                                                                                                                                                                                                                                                                                                                                                                                                                                                                                                                                                                                                                                                                                                                       | <input type="checkbox"/> | <input type="checkbox"/>                                                                                                                                                                                                                                                                                                                                                                                                                                                                                                                                                                                                                                                                                                                                                                                                                                                                                                                                                                                                                                                                                                                                                                                                                                                                                                                                                                                                                                                                                                                                                                                                                                                                                                                                                                                                                                                                                                                                                                                                                                                                                                                                                                                                                                                                                                                                                                                                                                                    |                        |                                                             |                          |                                                                        |                                                              |                          |                                                                    |                                                                  |                          |                                                                              |                                               |                          |                                                                                      |                                                                             |                          |                                                       |                                |                          |                               |                          |                          |                                                                        |                                      |                          |                                |                                     |                          |                          |                    |  |                                                                                                                                                                                                                                                                                                                                                                                                                                                                                       |  |
| 8. ... Por pena de que la revisaran?                                                                                                                                                                                                                                                                                                                                                                                                                                                                                                                                                                                                                                                                                                                                                                                                                                                                                                                                                                                                                                                                                                                                                                                                                                                                                                                                                                                                                                                                                                                                                                                                                                                                                                                                                                                                                                                                                                                                                                                                                                                                                                                                                                                                                                                                                                                                                                                                                                                                                                                    | <input type="checkbox"/> | <input type="checkbox"/>                                                                                                                                                                                                                                                                                                                                                                                                                                                                                                                                                                                                                                                                                                                                                                                                                                                                                                                                                                                                                                                                                                                                                                                                                                                                                                                                                                                                                                                                                                                                                                                                                                                                                                                                                                                                                                                                                                                                                                                                                                                                                                                                                                                                                                                                                                                                                                                                                                                    |                        |                                                             |                          |                                                                        |                                                              |                          |                                                                    |                                                                  |                          |                                                                              |                                               |                          |                                                                                      |                                                                             |                          |                                                       |                                |                          |                               |                          |                          |                                                                        |                                      |                          |                                |                                     |                          |                          |                    |  |                                                                                                                                                                                                                                                                                                                                                                                                                                                                                       |  |
| 9. ... Por algún otro motivo? _____                                                                                                                                                                                                                                                                                                                                                                                                                                                                                                                                                                                                                                                                                                                                                                                                                                                                                                                                                                                                                                                                                                                                                                                                                                                                                                                                                                                                                                                                                                                                                                                                                                                                                                                                                                                                                                                                                                                                                                                                                                                                                                                                                                                                                                                                                                                                                                                                                                                                                                                     | <input type="checkbox"/> | <input type="checkbox"/>                                                                                                                                                                                                                                                                                                                                                                                                                                                                                                                                                                                                                                                                                                                                                                                                                                                                                                                                                                                                                                                                                                                                                                                                                                                                                                                                                                                                                                                                                                                                                                                                                                                                                                                                                                                                                                                                                                                                                                                                                                                                                                                                                                                                                                                                                                                                                                                                                                                    |                        |                                                             |                          |                                                                        |                                                              |                          |                                                                    |                                                                  |                          |                                                                              |                                               |                          |                                                                                      |                                                                             |                          |                                                       |                                |                          |                               |                          |                          |                                                                        |                                      |                          |                                |                                     |                          |                          |                    |  |                                                                                                                                                                                                                                                                                                                                                                                                                                                                                       |  |
| <i>ESPECIFICAR</i>                                                                                                                                                                                                                                                                                                                                                                                                                                                                                                                                                                                                                                                                                                                                                                                                                                                                                                                                                                                                                                                                                                                                                                                                                                                                                                                                                                                                                                                                                                                                                                                                                                                                                                                                                                                                                                                                                                                                                                                                                                                                                                                                                                                                                                                                                                                                                                                                                                                                                                                                      |                          |                                                                                                                                                                                                                                                                                                                                                                                                                                                                                                                                                                                                                                                                                                                                                                                                                                                                                                                                                                                                                                                                                                                                                                                                                                                                                                                                                                                                                                                                                                                                                                                                                                                                                                                                                                                                                                                                                                                                                                                                                                                                                                                                                                                                                                                                                                                                                                                                                                                                             |                        |                                                             |                          |                                                                        |                                                              |                          |                                                                    |                                                                  |                          |                                                                              |                                               |                          |                                                                                      |                                                                             |                          |                                                       |                                |                          |                               |                          |                          |                                                                        |                                      |                          |                                |                                     |                          |                          |                    |  |                                                                                                                                                                                                                                                                                                                                                                                                                                                                                       |  |

# BÚSQUEDA DE ATENCIÓN MÉDICA DE PACIENTES QUE ACUDEN AL DEPARTAMENTO DE TUMORES MAMARIOS

## 3. UTILIZACIÓN DE SERVICIOS DE SALUD

**3.01** ¿A qué servicio médico acudió antes de llegar a este hospital? ¿Me puede ir diciendo uno por uno en orden? ¿A dónde fue primero? ¿Aproximadamente en qué fecha?

*UNA VEZ QUE HAYA RESPONDIDO EL PRIMER SERVICIO, PREGUNTAR PARA LOS SIGUIENTES: ¿Después a dónde fue?*

### TIPO DE SERVICIO DE SALUD

1. Centro de salud SSA (1er nivel)
2. Clínica SSA (2o nivel)
3. Hospital general de SSA (3er nivel)
4. Instituto Nacional de Salud \_\_\_\_\_  
*ESPECIFICAR*
5. Médico u hospital privado (particular)
6. Farmacias Similares
7. IMSS
8. ISSSTE
9. Otro \_\_\_\_\_  
*ESPECIFICAR*

OPCIÓN DE SERVICIO UTILIZADO (en orden cronológico)

|                          |
|--------------------------|
| <input type="checkbox"/> |

FECHA EN QUE UTILIZÓ 1er SERVICIO

|                      |                      |                      |                      |                      |                      |                      |                      |
|----------------------|----------------------|----------------------|----------------------|----------------------|----------------------|----------------------|----------------------|
| <input type="text"/> |
| <i>d d</i>           |                      | <i>m m m</i>         |                      |                      | <i>a a</i>           |                      |                      |
| número               |                      | letra                |                      |                      | número               |                      |                      |

**3.02** Y ese primer médico que vio, ¿Qué le dijo que tenía usted en su seno?

Le dijo que era:

- Tumor benigno..... 1  
 Tumor sospechoso..... 2  
 Tumor maligno (cáncer)..... 3  
 Otro \_\_\_\_\_  
*ESPECIFICAR*

**3.05** ¿Le han realizado una **biopsia** para este problema de salud?

- Sí ..... 1  
 No ..... 0

**3.03** ¿Qué estudios le pidió ese primer médico al que vio?

*SI RESPONDE SÓLO UN ESTUDIO, VERIFICAR SI LE PIDIERON MÁS, PREGUNTANDO:*

¿Ese primer médico le pidió algún otro estudio?

*PUEDEN SER VARIAS RESPUESTAS*

- Ultrasonido mamario..... 1  
 Mamografía o mastografía..... 2  
 Biopsia..... 3  
 Ninguno de los anteriores..... 0

**3.06** ¿De dónde la enviaron a este hospital?

- Centro de salud SSA (1er nivel) ..... 1  
 Clínica SSA (2o nivel)..... 2  
 Hospital general (3er nivel) ..... 3  
 Instituto Nacional de Salud ..... 4  
 Servicio de salud privado o particular ..... 5  
 Farmacias similares..... 6  
 IMSS..... 7  
 ISSSTE..... 8  
 Otro \_\_\_\_\_ 9

*ESPECIFICAR*

- Iniciativa propia de la paciente ..... 10  
 Consejo de un familiar o amigo ..... 11

**3.04** ¿Le **recetó** algún antiinflamatorio o antibiótico?

- Sí..... 1  
 No..... 0

**3.07** ¿Se ha tomado o se ha puesto algún remedio casero o de medicina alternativa para este problema de salud?

- Sí..... 1  
 No..... 0

*Se permite su reproducción y uso sólo con fines de investigación. Favor de citar la referencia como se indica:  
 The reproduction of this instrument is permitted for research use only. Please cite the reference appropriately as follows:  
 Unger-Saldaña K, Pelaez-Ballestas I & Infante-Castañeda C. Development and validation of a  
 questionnaire to assess breast cancer delay. BMC Cancer, 2012;12:626.*

## BÚSQUEDA DE ATENCIÓN MÉDICA DE PACIENTES QUE ACUDEN AL DEPARTAMENTO DE TUMORES MAMARIOS

### 4. APOYO DE LA RED SOCIAL

(Nombre de entrevistada), ahora le voy a hacer algunas preguntas acerca de las actividades que ha dejado de hacer para poder atenderse y acerca de las personas que más le han ayudado desde que empezó con este problema del pecho.

**4.01** ¿Usted ha dejado de hacer alguna de las siguientes actividades a causa de este problema de salud?

|                                           | SÍ                       | NO                       |
|-------------------------------------------|--------------------------|--------------------------|
| Labores del hogar?                        | <input type="checkbox"/> | <input type="checkbox"/> |
| Cuidado o atención de los hijos o nietos? | <input type="checkbox"/> | <input type="checkbox"/> |
| Trabajar?                                 | <input type="checkbox"/> | <input type="checkbox"/> |
| Actividades fuera del hogar?              | <input type="checkbox"/> | <input type="checkbox"/> |
| Otras actividades? _____                  | <input type="checkbox"/> | <input type="checkbox"/> |

*ESPECIFICAR*

**SI RESPONDIÓ "NO" EN TODAS LAS OPCIONES, PASE A 6.04.**

**4.05** ¿Cuánto tiempo pasó entre que notó por primera vez sus molestias y le platicó a PERSONA MENCIONADA EN 4.04 de ellas?

*RESPONDER EN MESES O DÍAS,  
SEGÚN COMO RESPONDA LA MUJER*

|       |  |  |      |  |
|-------|--|--|------|--|
|       |  |  |      |  |
| Meses |  |  | Días |  |

*(Si responde "inmediatamente" o "luego luego", poner "0" días)*

**4.02** ¿Alguien le ha ayudado a realizar estas actividades ahora que ha estado enferma?

Sí..... 1

No..... 0

**PASE A 4.04**

**4.06** ¿Quiénes le recomendaron consultar al médico para estas molestias?

1) **NOMBRE:** \_\_\_\_\_

**PARENTESCO:** \_\_\_\_\_

2) **NOMBRE:** \_\_\_\_\_

**PARENTESCO:** \_\_\_\_\_

3) **NOMBRE:** \_\_\_\_\_

**PARENTESCO:** \_\_\_\_\_

Nadie..... 0

**4.03** ¿Quiénes le han ayudado a hacer esas actividades?

**NOMBRE:** \_\_\_\_\_

**PARENTESCO:** \_\_\_\_\_

**NOMBRE:** \_\_\_\_\_

**PARENTESCO:** \_\_\_\_\_

**4.04** ¿A qué persona le platicó primero sobre su problema de salud?

**NOMBRE:** \_\_\_\_\_

**PARENTESCO:** \_\_\_\_\_

*Se permite su reproducción y uso sólo con fines de investigación. Favor de citar la referencia como se indica:*

*The reproduction of this instrument is permitted for research use only. Please cite the reference appropriately as follows:*

Unger-Saldaña K, Pelaez-Ballestas I & Infante-Castañeda C. **Development and validation of a questionnaire to assess breast cancer delay.** *BMC Cancer*, 2012.

## BÚSQUEDA DE ATENCIÓN MÉDICA DE PACIENTES QUE ACUDEN AL DEPARTAMENTO DE TUMORES MAMARIOS

| 4. APOYO DE LA RED SOCIAL (Continuación)                                                                                                                                                                                                                                                                                                                                                                                                                                                                                                                                                                                                                                                                                                                                       |                                                                                                                                                                                                                                                                                                                                                                                                                                                   |
|--------------------------------------------------------------------------------------------------------------------------------------------------------------------------------------------------------------------------------------------------------------------------------------------------------------------------------------------------------------------------------------------------------------------------------------------------------------------------------------------------------------------------------------------------------------------------------------------------------------------------------------------------------------------------------------------------------------------------------------------------------------------------------|---------------------------------------------------------------------------------------------------------------------------------------------------------------------------------------------------------------------------------------------------------------------------------------------------------------------------------------------------------------------------------------------------------------------------------------------------|
| <p><b>4.07</b> ¿Hasta ahora el pago de sus consultas, estudios y tratamientos ha sido con su dinero o alguien le ha prestado o dado dinero para pagarlos?</p> <p>Ella ha pagado todo (o alguien de su hogar familiar)..... 0</p> <p>Pago compartido entre ella y otro ..... 1</p> <p>Alguien más ha pagado todo ..... 2</p>                                                                                                                                                                                                                                                                                                                                                                                                                                                    | <p><b>4.10</b> ¿Qué persona(s) la acompaña(n) habitualmente a sus consultas médicas?</p> <p>1) <b>NOMBRE:</b> _____</p> <p style="padding-left: 40px;"><b>PARENTESCO:</b> _____</p> <p>2) <b>NOMBRE:</b> _____</p> <p style="padding-left: 40px;"><b>PARENTESCO:</b> _____</p> <p>3) <b>NOMBRE:</b> _____</p> <p style="padding-left: 40px;"><b>PARENTESCO:</b> _____</p> <p style="text-align: center;">Nadie..... 0</p>                         |
| <p><b>4.08</b> ¿Aproximadamente <b>cuánto ha tenido que gastar usted de su dinero</b>, en total en consultas, medicinas y estudios médicos hasta ahora?</p> <div style="display: flex; align-items: center; margin: 10px 0;"> <div style="border: 1px solid black; width: 20px; height: 20px; margin-right: 5px;"></div> <div style="border: 1px solid black; width: 20px; height: 20px; margin-right: 5px;"></div> <div style="border: 1px solid black; width: 20px; height: 20px; margin-right: 5px;"></div> <div style="border: 1px solid black; width: 20px; height: 20px; margin-right: 5px;"></div> <div style="border: 1px solid black; width: 20px; height: 20px; margin-right: 5px;"></div> <div style="margin-left: 5px;">pesos</div> </div> <p>No sabe ..... 98</p> | <p><b>4.11</b> ¿Usted quién(es) siente que es(son) la(s) persona(s) que más la ha(n) apoyado emocionalmente?</p> <p>1) <b>NOMBRE:</b> _____</p> <p style="padding-left: 40px;"><b>PARENTESCO:</b> _____</p> <p>2) <b>NOMBRE:</b> _____</p> <p style="padding-left: 40px;"><b>PARENTESCO:</b> _____</p> <p>3) <b>NOMBRE:</b> _____</p> <p style="padding-left: 40px;"><b>PARENTESCO:</b> _____</p> <p style="text-align: center;">Nadie..... 0</p> |
| <p><b>4.09</b> ¿Quién(es) le ha(n) ayudado económicamente hasta ahora para pagar sus estudios, tratamientos o consultas de este problema de salud?</p> <p>1) <b>NOMBRE:</b> _____</p> <p style="padding-left: 40px;"><b>PARENTESCO:</b> _____</p> <p>2) <b>NOMBRE:</b> _____</p> <p style="padding-left: 40px;"><b>PARENTESCO:</b> _____</p> <p>3) <b>NOMBRE:</b> _____</p> <p style="padding-left: 40px;"><b>PARENTESCO:</b> _____</p> <p style="text-align: center;">Nadie..... 0</p>                                                                                                                                                                                                                                                                                        | <p><b>4.12</b> Si tuviera que elegir a 1 persona. ¿Quién diría que es la persona que más le ha ayudado o apoyado desde que comenzó con este problema de salud?</p> <p style="padding-left: 40px;"><b>NOMBRE:</b> _____</p> <p style="padding-left: 40px;"><b>PARENTESCO:</b> _____</p> <p style="text-align: center;">Nadie..... 0</p>                                                                                                            |

*Se permite su reproducción y uso sólo con fines de investigación. Favor de citar la referencia como se indica:*

*The reproduction of this instrument is permitted for research use only. Please cite the reference appropriately as follows:*

Unger-Saldaña K, Pelaez-Ballestas I & Infante-Castañeda C. **Development and validation of a questionnaire to assess breast cancer delay.** *BMC Cancer*, 2012;12:626.

## BÚSQUEDA DE ATENCIÓN MÉDICA DE PACIENTES QUE ACUDEN AL DEPARTAMENTO DE TUMORES MAMARIOS

(Nombre de la entrevistada), ahora le voy a hacer algunas preguntas acerca de algunas prácticas de detección temprana de cáncer.

### 5. CONOCIMIENTOS Y PRÁCTICAS DE DETECCIÓN OPORTUNA DE CÁNCER

|                                                                                                                                                                                                                                                                                                                                                                                                                                                                                                                                                                                                                                                                                                                                                                                                                                                                                                                                                                                                                                                                                                                                                                                                                                                                                                                                                                                                                                         |   |                                                                                                                                                                                                                                                              |   |   |        |   |  |   |   |   |   |   |   |   |        |  |       |  |  |        |  |  |                                                                                                                                                                                      |  |
|-----------------------------------------------------------------------------------------------------------------------------------------------------------------------------------------------------------------------------------------------------------------------------------------------------------------------------------------------------------------------------------------------------------------------------------------------------------------------------------------------------------------------------------------------------------------------------------------------------------------------------------------------------------------------------------------------------------------------------------------------------------------------------------------------------------------------------------------------------------------------------------------------------------------------------------------------------------------------------------------------------------------------------------------------------------------------------------------------------------------------------------------------------------------------------------------------------------------------------------------------------------------------------------------------------------------------------------------------------------------------------------------------------------------------------------------|---|--------------------------------------------------------------------------------------------------------------------------------------------------------------------------------------------------------------------------------------------------------------|---|---|--------|---|--|---|---|---|---|---|---|---|--------|--|-------|--|--|--------|--|--|--------------------------------------------------------------------------------------------------------------------------------------------------------------------------------------|--|
| <p><b>5.01</b> ¿Aproximadamente, cuándo fue la última vez que se hizo el Papanicolaou?</p> <div style="text-align: center; margin: 10px 0;"> <table style="margin: auto; border-collapse: collapse;"> <tr> <td style="border: 1px solid black; width: 20px; height: 20px;"></td> <td style="border: 1px solid black; width: 20px; height: 20px;"></td> <td style="border: 1px solid black; width: 20px; height: 20px;"></td> <td style="border: 1px solid black; width: 20px; height: 20px;"></td> <td style="border: 1px solid black; width: 20px; height: 20px;"></td> <td style="border: 1px solid black; width: 20px; height: 20px;"></td> <td style="border: 1px solid black; width: 20px; height: 20px;"></td> </tr> <tr> <td style="text-align: center; font-size: small;">d</td> <td style="text-align: center; font-size: small;">d</td> <td style="text-align: center; font-size: small;">m</td> <td style="text-align: center; font-size: small;">m</td> <td style="text-align: center; font-size: small;">m</td> <td style="text-align: center; font-size: small;">a</td> <td style="text-align: center; font-size: small;">a</td> </tr> <tr> <td colspan="2" style="text-align: center; font-size: x-small;">número</td> <td colspan="3" style="text-align: center; font-size: x-small;">letra</td> <td colspan="2" style="text-align: center; font-size: x-small;">número</td> </tr> </table> </div> <p>Nunca ..... 0</p> |   |                                                                                                                                                                                                                                                              |   |   |        |   |  | d | d | m | m | m | a | a | número |  | letra |  |  | número |  |  | <p><b>5.05</b> ¿Para qué sirve hacerse una mamografía o mastografía?</p> <p>Para detectar tempranamente cáncer de mama o respuesta similar ..... 1</p> <p>Otra respuesta ..... 0</p> |  |
|                                                                                                                                                                                                                                                                                                                                                                                                                                                                                                                                                                                                                                                                                                                                                                                                                                                                                                                                                                                                                                                                                                                                                                                                                                                                                                                                                                                                                                         |   |                                                                                                                                                                                                                                                              |   |   |        |   |  |   |   |   |   |   |   |   |        |  |       |  |  |        |  |  |                                                                                                                                                                                      |  |
| d                                                                                                                                                                                                                                                                                                                                                                                                                                                                                                                                                                                                                                                                                                                                                                                                                                                                                                                                                                                                                                                                                                                                                                                                                                                                                                                                                                                                                                       | d | m                                                                                                                                                                                                                                                            | m | m | a      | a |  |   |   |   |   |   |   |   |        |  |       |  |  |        |  |  |                                                                                                                                                                                      |  |
| número                                                                                                                                                                                                                                                                                                                                                                                                                                                                                                                                                                                                                                                                                                                                                                                                                                                                                                                                                                                                                                                                                                                                                                                                                                                                                                                                                                                                                                  |   | letra                                                                                                                                                                                                                                                        |   |   | número |   |  |   |   |   |   |   |   |   |        |  |       |  |  |        |  |  |                                                                                                                                                                                      |  |
| <p><b>5.02</b> Antes de este problema de salud, ¿algún médico o enfermera le había revisado los senos o pechos?</p> <p>Sí..... 1</p> <p>No..... 0</p>                                                                                                                                                                                                                                                                                                                                                                                                                                                                                                                                                                                                                                                                                                                                                                                                                                                                                                                                                                                                                                                                                                                                                                                                                                                                                   |   | <p><b>5.06</b> ¿A partir de qué edad se recomienda que una mujer se haga una mamografía anual?</p> <p>A partir de los 40..... 1</p> <p>Otra respuesta _____ 2</p> <p style="text-align: center; font-size: x-small;">ESPECIFICAR</p> <p>No sabe ..... 98</p> |   |   |        |   |  |   |   |   |   |   |   |   |        |  |       |  |  |        |  |  |                                                                                                                                                                                      |  |
| <p><b>5.03</b> Antes del problema de seno que tiene ahora, ¿había escuchado hablar de la mamografía o mastografía?</p> <p>Sí ..... 1</p> <p>No ..... 2</p>                                                                                                                                                                                                                                                                                                                                                                                                                                                                                                                                                                                                                                                                                                                                                                                                                                                                                                                                                                                                                                                                                                                                                                                                                                                                              |   | <p><b>5.07</b> ¿Le habían realizado alguna mamografía <u>antes</u> de este problema?</p> <p>No..... 0</p> <p>Sí, más de 1 ..... 1</p> <p>Sí, sólo 1 ..... 2</p>                                                                                              |   |   |        |   |  |   |   |   |   |   |   |   |        |  |       |  |  |        |  |  |                                                                                                                                                                                      |  |
| <p><b>5.04</b> ¿Usted acostumbra revisarse los senos usted misma?</p> <p>Sí..... 1</p> <p>No..... 0</p>                                                                                                                                                                                                                                                                                                                                                                                                                                                                                                                                                                                                                                                                                                                                                                                                                                                                                                                                                                                                                                                                                                                                                                                                                                                                                                                                 |   | <p><b>5.08</b> ¿Conoce a alguna persona cercana a usted que haya tenido o que tenga cáncer?</p> <p>Sí..... 1</p> <p>No..... 0</p>                                                                                                                            |   |   |        |   |  |   |   |   |   |   |   |   |        |  |       |  |  |        |  |  |                                                                                                                                                                                      |  |

*Se permite su reproducción y uso sólo con fines de investigación. Favor de citar la referencia como se indica:*

*The reproduction of this instrument is permitted for research use only. Please cite the reference appropriately as follows:*

Unger-Saldaña K, Pelaez-Ballestas I & Infante-Castañeda C. **Development and validation of a questionnaire to assess breast cancer delay.** *BMC Cancer*, 2012;12:626.
